# Supplementary material for: A recurrent deletion in the SLC5A2 gene including the intron 7 branch site responsible for familial renal glucosuria
Source: PubMed Central journal article supplement (PMC5036194; doi:10.1038/srep33920), 2016-09-26
Supplement: srep33920-s1.pdf [file srep33920-s1.pdf]

**Title: A recurrent deletion in the SLC5A2 gene including the intron 7 branch site responsible for familial renal glucosuria**

Authors: Xiangzhong Zhao<sup>a</sup>, Li Cui<sup>b</sup>, Yanhua Lang<sup>b</sup>, Ting liu<sup>a,b</sup>, Jingru Lu<sup>a,b</sup>, Cui Wang<sup>a,b</sup>, Sylvie Tuffery-Giraud<sup>c</sup>, Irene Bottillo<sup>d</sup>, Xinsheng Wang<sup>e</sup>, Leping Shao<sup>a,b</sup>

<sup>a</sup>Central Laboratory, <sup>b</sup>Department of Nephrology and <sup>c</sup>Urology, Affiliated Hospital, Qingdao University, Qingdao 266003, China; <sup>e</sup>Laboratoire de Génétique de Maladies Rares, Université de Montpellier, France; <sup>d</sup>Division of Medical Genetics, Department of Molecular Medicine, Sapienza University, San Camillo-Forlanini Hospital, Rome, Italy.

Corresponding Author:

Leping Shao, Central Laboratory and Department of Nephrology, the Affiliated Hospital of Qingdao University, 16 Jiangsu Road, Qingdao 266003, China. Tel: +8653282911301; Fax: +8653282911093; E-mail: lepingshao@163.com

And

Xinsheng Wang, Department of Urology, the Affiliated Hospital of Qingdao University, 16 Jiangsu Road, Qingdao 266003, China. Tel: +8653282911801; Fax: +8653282911188; E-mail: qy\_wangxs@126.com

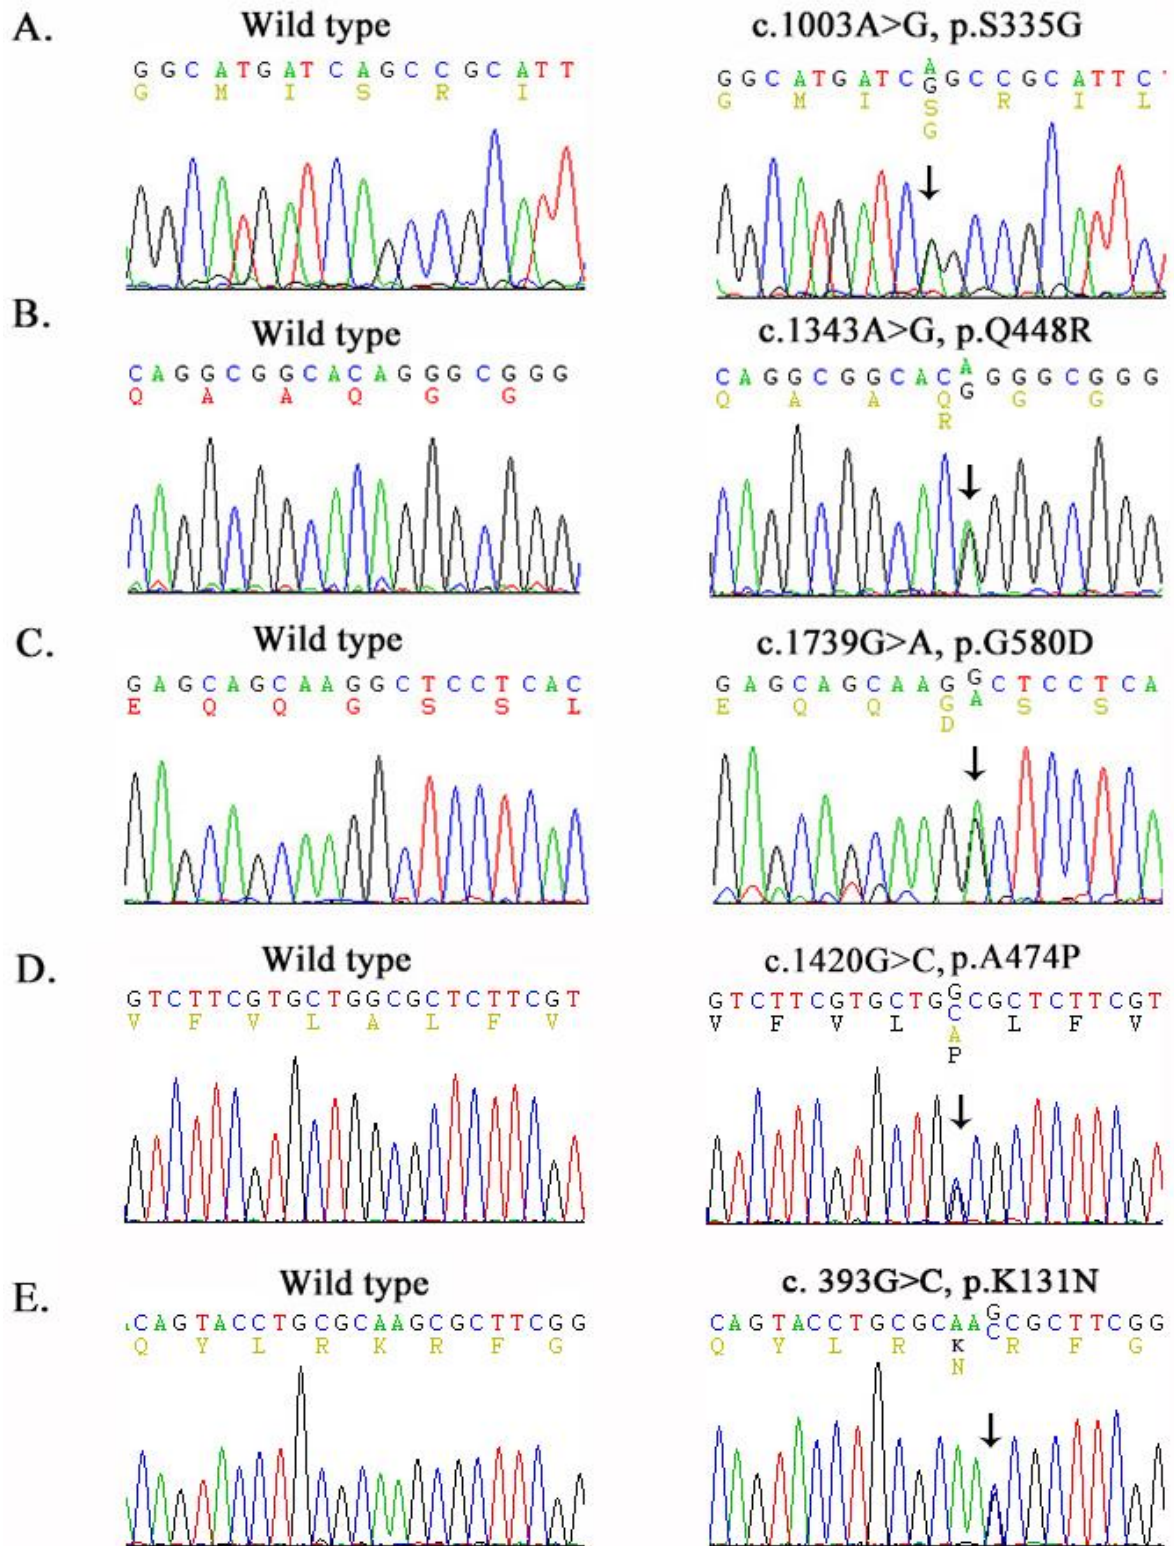

**Supplemental Figure 1.** SLC5A2 missense mutations identified in Chinese patients with Familial

Renal Glucosuria.

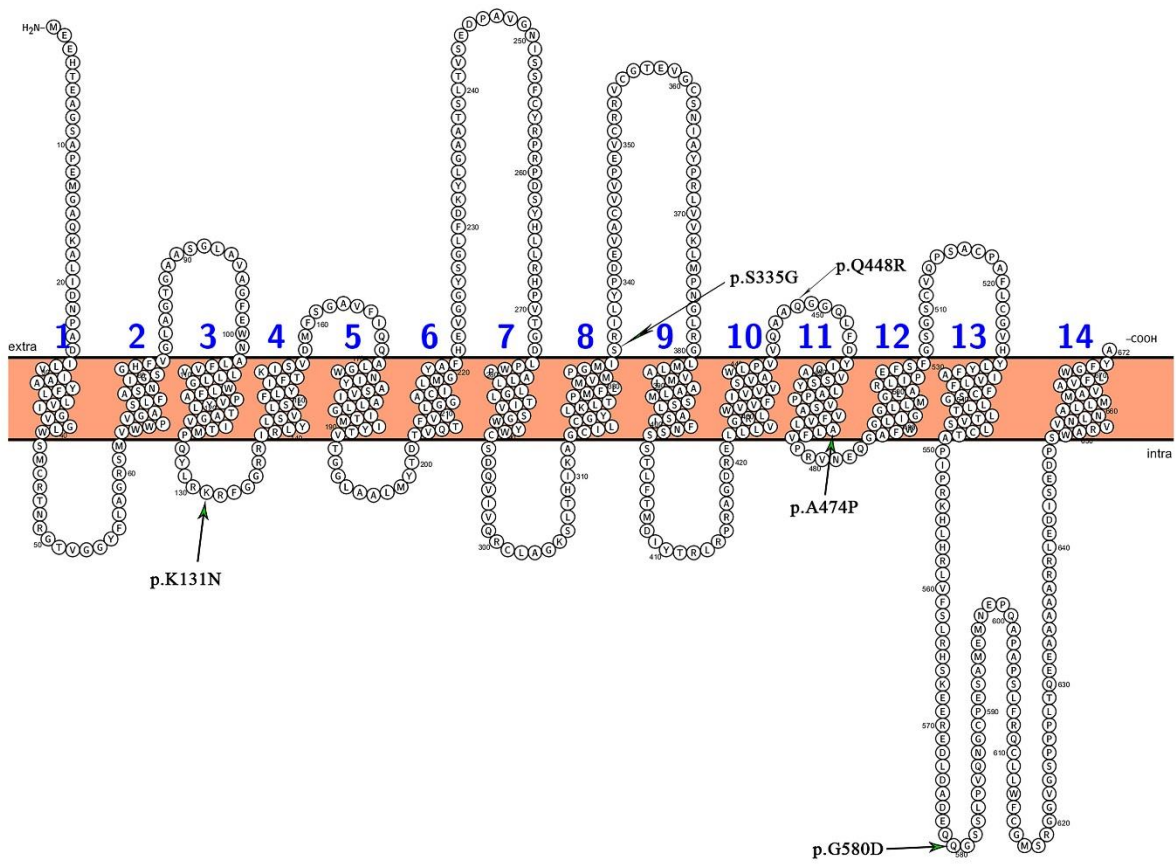

**Supplemental Figure 2.** Schematic diagram of the SGLT2 and missense mutations in Chinese Familial Renal Glucosuria patients. The SGLT2 is represented as a 14-transmembrane-domain protein with extracellular amino and carboxyl termini. The sites of mutations are denoted by arrows.

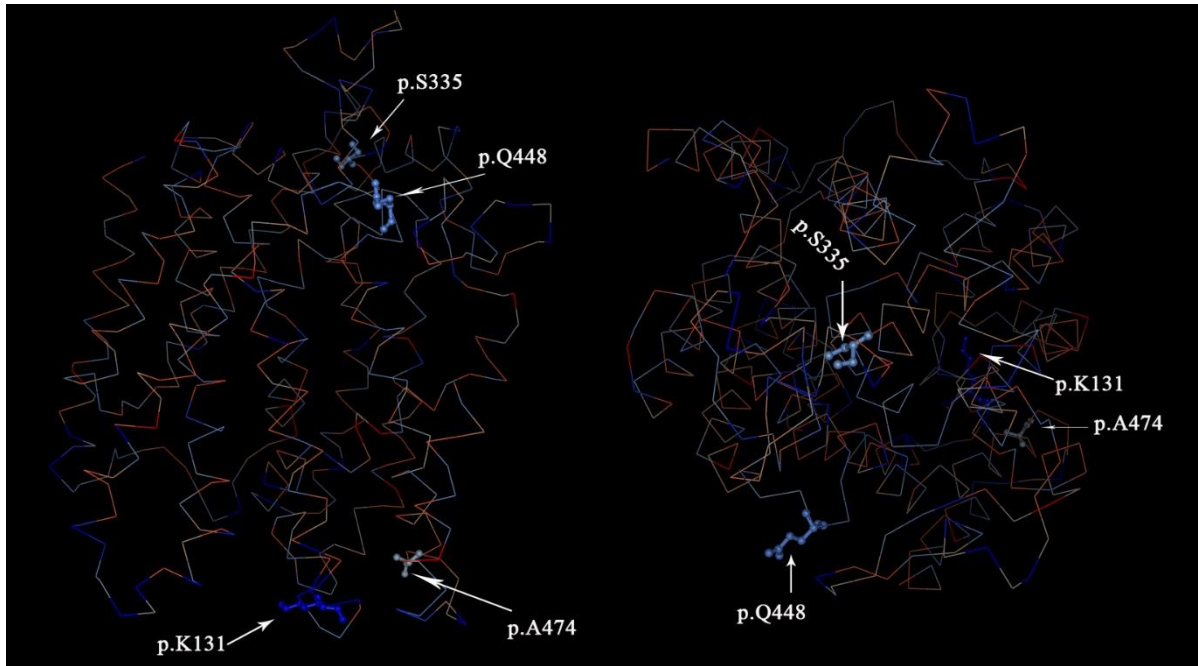

**Supplemental Figure 3.** The 3D SWISSMODEL of SGLT2 (Residue range: 25 to 497; Based on template: 2xq2A; Sequence identity: 31%; Resolution: 2.73 (X-RAY)) and the positions of the mutations p.K131, p.S335, p.Q448 and p.A474 in it.

**Supplemental Table 1.** Five missense mutations in SLC5A2 gene identified in this study and their pathogenicity predicted by three different in silico programs (SIFT, PolyPhen-2 and Mutation Taster)

| Exon    | Nucleotide changes | Amino acid change | SIFT      | PolyPhen-2        | Mutation Taster |
|---------|--------------------|-------------------|-----------|-------------------|-----------------|
| Exon 4  | c.393G>C           | p.K131N           | Damaging  | Probably Damaging | Disease causing |
| Exon 8  | c.1003A>G          | p.S335G           | Damaging  | Probably Damaging | Disease causing |
| Exon 11 | c.1343A>G          | p.Q448R           | Tolerated | Probably Damaging | Disease causing |
| Exon 11 | c.1420G>C          | p.A474P           | Damaging  | Probably Damaging | Disease causing |
| Exon 13 | c.1739G>A          | p.G580D           | Tolerated | Benign            | Polymorphism    |

**Supplemental Table 2.** The predicted effects of the deletion c.886(-10\_-31)del in intron 7 on the putative branching point motif by in silico program HSF3.0

| cDNA Position | Branch Point motif | CV for reference sequence (0-100) | CV for mutant sequence (0-100) | Variation   |
|---------------|--------------------|-----------------------------------|--------------------------------|-------------|
| c.886-34      | CCCGCAA            | 78.29                             | 49.51                          | Site broken |
| c.886-33      | CCGCAAG            | 50.69                             | 70.37                          | New site    |
| c.886-29      | AAGCGGG            | 16.84                             | 70.36                          | New site    |
| c.886-21      | AGCTGAA            | 79.62                             | 39.23                          | Site broken |

CV, cut-off value
